# Supplementary material for: A Robust Homogeneous Fluorescence Polarization Immunoassay for Rapid Determination of Erythromycin in Milk
Source: MDPI journal article supplement (doi:10.3390/foods12081581), 2023-04-07
Supplement: s1 [file s1]

Supporting information for

**A Robust Homogeneous Fluorescence Polarization Immunoassay for  
Rapid Determination of Erythromycin in Milk**

Changfei Duan<sup>1</sup>, Huiyan Zhang<sup>1</sup>, Yingjie Zhang<sup>1</sup>, Qiang Li<sup>1</sup>, Peipei Li<sup>1</sup>, Ghulam  
Mujtaba Mari<sup>2</sup>, Sergei A. Eremin<sup>3</sup>, Jianzhong Shen<sup>1</sup>, Zhanhui Wang<sup>1\*</sup>

<sup>1</sup> National Key Laboratory of Veterinary Public Health Security, Beijing Key  
Laboratory of Detection Technology for Animal-Derived Food, College of Veterinary  
Medicine, China Agricultural University, 100193 Beijing, People's Republic of China

<sup>2</sup> Department of Veterinary Pharmacology and Toxicology, Faculty of Bio-Sciences,  
Shaheed Benazir Bhutto University of Veterinary and Animal Sciences, Sakrand, 67210.  
Pakistan

<sup>3</sup> Department of Chemistry, M.V. Lomonosov Moscow State University, 119991  
Moscow, Russia

*\*Corresponding author: Zhanhui Wang*

*Tel: +86-10-6273 4565*

*Fax: +86-10-6273 1032*

*E-mail: wangzhanhui@cau.edu.cn*

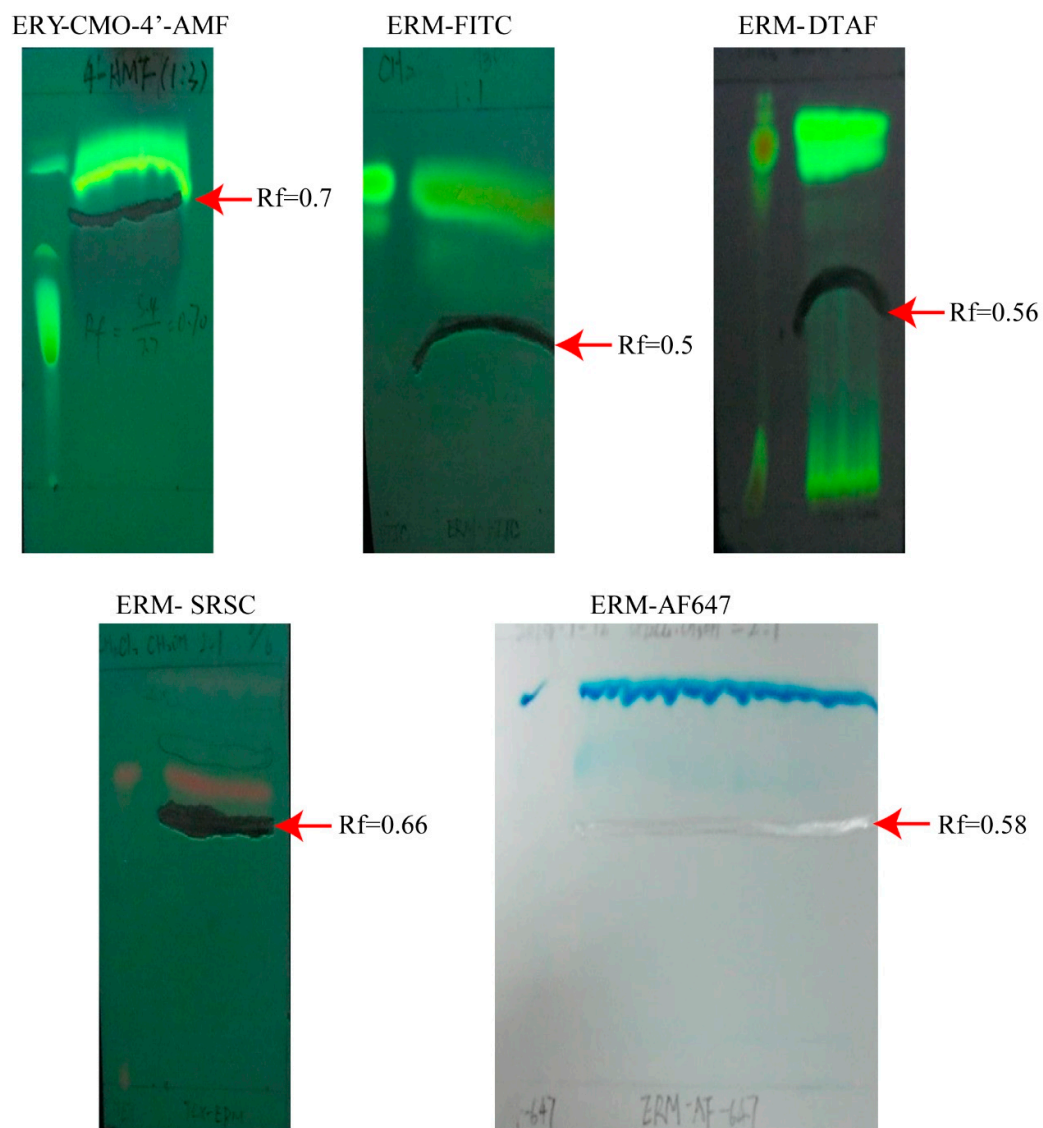

**Figure S1** The TLC purification of tracers.

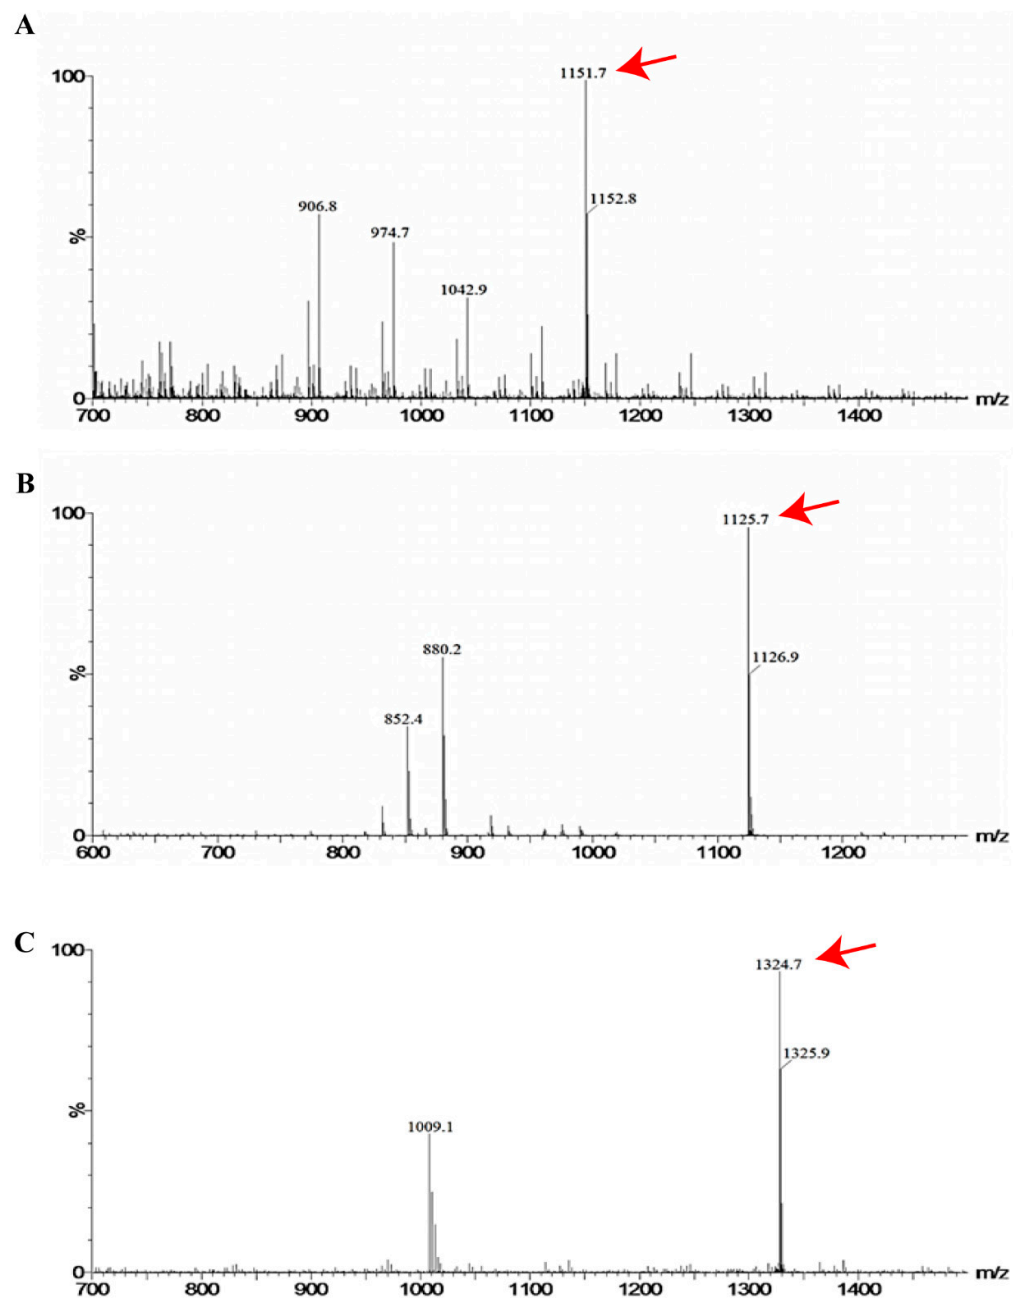

**Figure S2** Mass spectra of the ERY-CMO-4'-AMF(A), ERM-FITC (B) and ERM-SRSC (C).

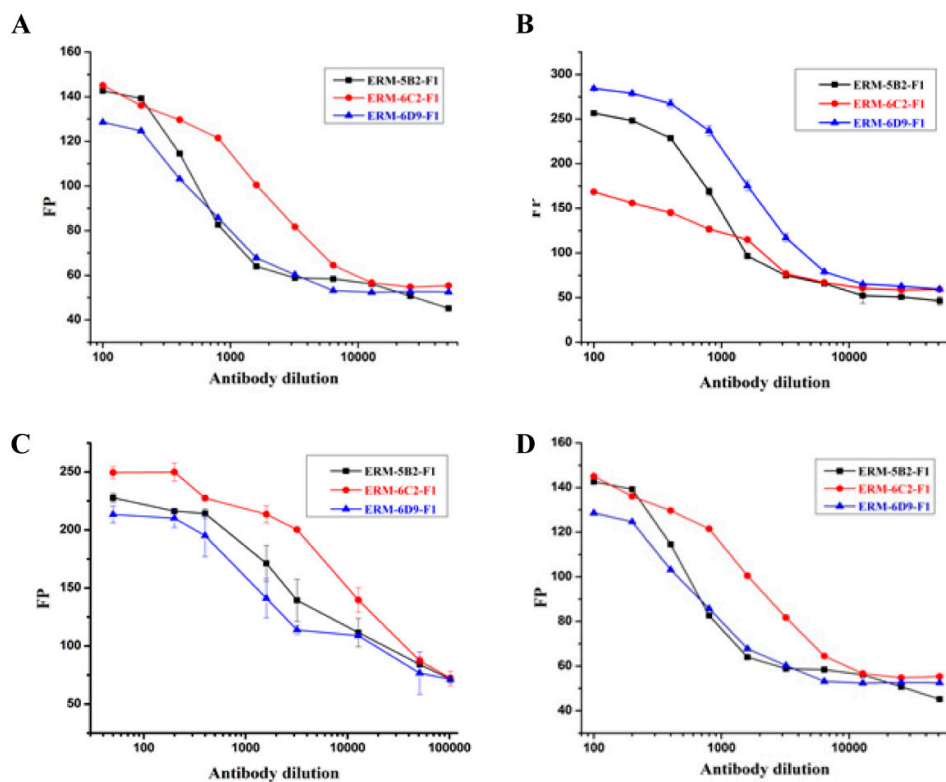

**Figure S3** Binding curves for three antibodies with the ERY-CMO-4'-AMF (A), ERM-FITC (B), ERM-AF647 (C) and ERM-SRSC (D), respectively.

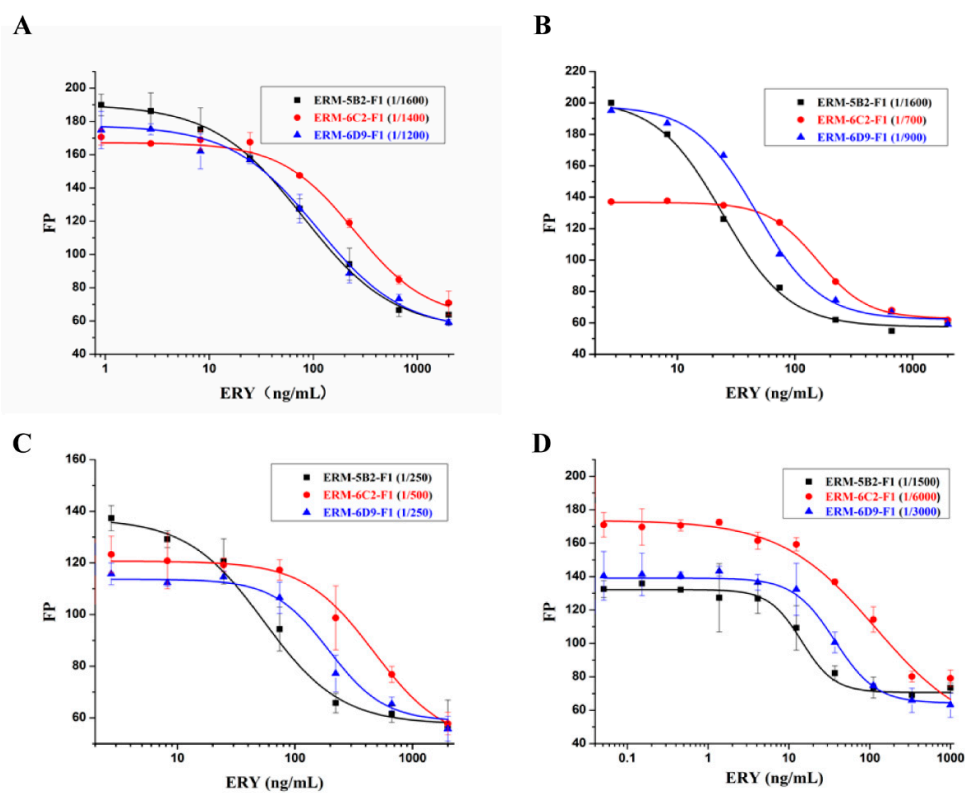

**Figure S4** Standard curves for three antibodies with ERY-CMO-4'-AMF (A), ERM-FITC (B), ERM-SRSC (C) and ERM-AF647 (D).

**Table S1.** The IC<sub>50</sub> values and CRs of FPIA.

| Type                          | Name | Structures                                                                                                                                                                                                                                                                                                                                                                                                                        | IC <sub>50</sub><br>(ng/mL) | CRs<br>(%) |
|-------------------------------|------|-----------------------------------------------------------------------------------------------------------------------------------------------------------------------------------------------------------------------------------------------------------------------------------------------------------------------------------------------------------------------------------------------------------------------------------|-----------------------------|------------|
| 14-<br>membered<br>macrolides | ERY  | The chemical structure of Erythromycin (ERY) is a 14-membered macrolide. It features a 14-membered ring with a ketone at C2, a hydroxyl group at C3, and a dimethylamino group at C14. It is substituted with a 2,6-dideoxy-3,4-dihydroxy-5-methyl-erythro-pentose at C3 and a 2,6-dideoxy-3,4-dihydroxy-5-methyl-erythro-pentose at C14.                                                                                         | 7.39                        | 100.0      |
|                               | DIR  | The chemical structure of Dirithromycin (DIR) is a 14-membered macrolide. It features a 14-membered ring with a ketone at C2, a hydroxyl group at C3, and a dimethylamino group at C14. It is substituted with a 2,6-dideoxy-3,4-dihydroxy-5-methyl-erythro-pentose at C3 and a 2,6-dideoxy-3,4-dihydroxy-5-methyl-erythro-pentose at C14. It also has a 2,6-dideoxy-3,4-dihydroxy-5-methyl-erythro-pentose at C14.               | 4.71                        | 156.9      |
|                               | ROX  | The chemical structure of Roxithromycin (ROX) is a 14-membered macrolide. It features a 14-membered ring with a ketone at C2, a hydroxyl group at C3, and a dimethylamino group at C14. It is substituted with a 2,6-dideoxy-3,4-dihydroxy-5-methyl-erythro-pentose at C3 and a 2,6-dideoxy-3,4-dihydroxy-5-methyl-erythro-pentose at C14. It also has a 2,6-dideoxy-3,4-dihydroxy-5-methyl-erythro-pentose at C14.               | 8.05                        | 91.8       |
|                               | ERE  | The chemical structure of Erythromycin Ethylsuccinate (ERE) is a 14-membered macrolide. It features a 14-membered ring with a ketone at C2, a hydroxyl group at C3, and a dimethylamino group at C14. It is substituted with a 2,6-dideoxy-3,4-dihydroxy-5-methyl-erythro-pentose at C3 and a 2,6-dideoxy-3,4-dihydroxy-5-methyl-erythro-pentose at C14. It also has a 2,6-dideoxy-3,4-dihydroxy-5-methyl-erythro-pentose at C14. | 16.91                       | 43.7       |
|                               | CLA  | The chemical structure of Clarithromycin (CLA) is a 14-membered macrolide. It features a 14-membered ring with a ketone at C2, a hydroxyl group at C3, and a dimethylamino group at C14. It is substituted with a 2,6-dideoxy-3,4-dihydroxy-5-methyl-erythro-pentose at C3 and a 2,6-dideoxy-3,4-dihydroxy-5-methyl-erythro-pentose at C14. It also has a 2,6-dideoxy-3,4-dihydroxy-5-methyl-erythro-pentose at C14.              | 27.67                       | 26.7       |

|                        |     |                                                                                      |       |       |
|------------------------|-----|--------------------------------------------------------------------------------------|-------|-------|
|                        | ERM | 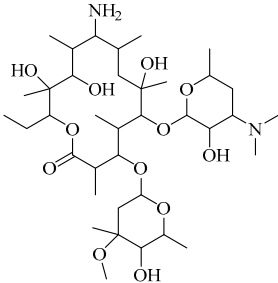    | 16.79 | 44.0  |
|                        | OLE |     | —     | < 0.1 |
| 16-membered macrolides | KIT |   | —     | < 0.1 |
|                        | JOS |  | —     | < 0.1 |
|                        | IVM |   | —     | < 0.1 |
|                        | AVE |  | —     | < 0.1 |
|                        | TYL |  | —     | < 0.1 |

|               |                 |  |   |       |
|---------------|-----------------|--|---|-------|
|               | SPI             |  | — | < 0.1 |
| pleuromutilin | VAL             |  | — | < 0.1 |
|               | TAM<br>tiamulin |  | — | < 0.1 |



**Table S2.** The parameters of standard curves in BB, BB with skimmed milk powder, and milk matrix, respectively.

| Standard curve              | $\delta\text{mP}$<br>(mP) | $\text{IC}_{50}$<br>(ng/mL) | $\text{IC}_{10}$<br>(ng/mL) | $\text{IC}_{20}\text{-IC}_{80}$<br>(ng/mL) | $R^2$  |
|-----------------------------|---------------------------|-----------------------------|-----------------------------|--------------------------------------------|--------|
| Milk matrix                 | 47.0                      | 4.95                        | 1.2                         | 2.02-12.14                                 | 0.9971 |
| BB with skimmed milk powder | 55.8                      | 5.66                        | 1.05                        | 1.95-16.39                                 | 0.9931 |
| BB                          | 74.2                      | 7.39                        | 0.83                        | 1.85-29.47                                 | 0.9969 |

**Table S3.** Summary of typically reported immunoassays for the determination of ERY.

| Methods         | Samples | LOD/LOQ<br>( $\mu\text{g/L}$ or $\mu\text{g/kg}$ ) | Assay Time              |                   |
|-----------------|---------|----------------------------------------------------|-------------------------|-------------------|
|                 |         |                                                    | (from added<br>samples) | Reference         |
| ciELISA         | milk    | 0.3                                                | 2h 30 min               | [28]              |
| ciELISA         | milk    | 0.03                                               | 2h 40 min               | [36]              |
| IGCA            | milk    | 5                                                  | 10 min                  | [37]              |
| MISPE-HPLC-ELSD | milk    | 10                                                 | 15 min                  | [13]              |
| HPLC            | milk    | 25                                                 | 15 min                  | [1]               |
| MISPE-LC-MS/MS  | muscle  | 1.0                                                | 15 min                  | [12]              |
| LC-MS/MS        | muscle  | 5                                                  | 20 min                  | [38]              |
| FPIA            | milk    | 14.08                                              | <b>5 min</b>            | <b>This study</b> |

ciELISA: competitive indirect enzyme-linked immunosorbent assay

IGCA: immunogold chromatographic assay

MISPE-HPLC-ELSD: molecularly imprinted polymers solid phase extraction combining with High Performance Liquid Chromatography-Evaporation Light Scattering Detection

HPLC: High Performance Liquid Chromatography

MISPE-LC-MS/MS: Molecularly imprinted polymer solid phase extraction combining with LC-MS/MS

LC-MS/MS: liquid chromatography-tandem mass spectrometry
